# Supplementary material for: Why is Mortalin a Potential Therapeutic Target for Cancer?
Source: Frontiers journal article supplement (doi:10.3389/fcell.2022.914540), 2022-06-29
Supplement: Table_1.PDF [file Table_1.PDF]

1 Table 1.

| Therapeutic platform | Agent                                                         | Targeting effects                                                                                                                                                                                                                                                                                                                                                                         | Reference    |
|----------------------|---------------------------------------------------------------|-------------------------------------------------------------------------------------------------------------------------------------------------------------------------------------------------------------------------------------------------------------------------------------------------------------------------------------------------------------------------------------------|--------------|
| Natural compounds    | Withaferin A<br>(Wi-A; withanolides from Ashwagandha)         | <ul style="list-style-type: none"> <li>- Induction of apoptosis</li> <li>- Inhibition of Notch-1 signaling</li> <li>- Downregulation of serine-threonine kinase (Akt)/nuclear factor (NF)-kB/B-cell lymphoma (Bcl)-2 pathways</li> <li>- Strong cytotoxicity to both cancer and normal cells</li> <li>- Potent anti-migratory, anti-invasive, and anti-angiogenic activities</li> </ul>   | [27-33]      |
|                      | Withanone<br>(Wi-N; withanolides from Ashwagandha)            | <ul style="list-style-type: none"> <li>- Interaction with p53, hmot-2, p21WAF1, and nuclear factor-erythroid 2-related factor 2 (Nrf2) (i-Extract)</li> <li>- Increased selective killing of cancer cells</li> </ul>                                                                                                                                                                      | [33, 37-40]  |
|                      | CAPE<br>(Ingredient of New Zealand honeybee propolis)         | <ul style="list-style-type: none"> <li>- Disruption of the mortalin–p53 complex</li> <li>- Increased translocation and activation of p53 in the nucleus</li> <li>- Enhancement of anti-tumor and anti-metastasis (<math>\gamma</math>CD-complexed CAPE)</li> </ul>                                                                                                                        | [41, 42, 44] |
|                      | Artepillin C<br>(Ingredient of Brazilian green propolis)      | <ul style="list-style-type: none"> <li>- Abrogation of mortalin–p53 complexes, activation of p53</li> <li>- Increased growth arrest of cancer cells</li> <li>- Increased cytotoxicity <i>in vitro</i> (green propolis-supercritical extract (GPSE) - conjugated with <math>\gamma</math>CD)</li> <li>- Potent anticancer activity (GPSE-conjugated with <math>\gamma</math>CD)</li> </ul> | [45]         |
|                      | Veratridine (VTD)<br>(Alkaloid derived from Liliaceae plants) | <ul style="list-style-type: none"> <li>- Increased transactivation of cytoplasmic UBX domain protein 2A (UBXN2A)</li> <li>- Inhibition of motalin</li> <li>- Increased tumor-specific toxicity</li> <li>- Induction of cancer chemosensitivity</li> </ul>                                                                                                                                 | [23]         |
|                      | Embelin<br>(natural quinone from <i>Embelia ribes</i> )       | <ul style="list-style-type: none"> <li>- Induction of cancer chemosensitivity</li> <li>- Increased nuclear translocation of p53</li> <li>- Abolished activity of the mortalin–p53 complex</li> <li>- Downregulation of growth factor expression and metastatic signaling pathway</li> <li>- Inhibition of cancer cell growth</li> </ul>                                                   | [46]         |
|                      | Fucoxanthin<br>(found in marine organisms)                    | <ul style="list-style-type: none"> <li>- Suppression of the transcriptional activity of mortalin</li> <li>- Activation of p53 function in cancer cells</li> <li>- Decreased cancer cell proliferation and survival</li> <li>- Cancer cell-specific killing</li> </ul>                                                                                                                     | [47]         |

|                    |                                                                                |                                                                                                                                                                                                                                                                                                                                                                                                                                   |          |
|--------------------|--------------------------------------------------------------------------------|-----------------------------------------------------------------------------------------------------------------------------------------------------------------------------------------------------------------------------------------------------------------------------------------------------------------------------------------------------------------------------------------------------------------------------------|----------|
|                    |                                                                                | <ul style="list-style-type: none"> <li>- Decreased migration and invasion of cancer cells</li> </ul>                                                                                                                                                                                                                                                                                                                              |          |
| Chemical compounds | MKT-077<br>(C <sub>21</sub> H <sub>22</sub> ClN <sub>3</sub> OS <sub>2</sub> ) | <ul style="list-style-type: none"> <li>- Elimination of mortalin–p53 interactions (no alteration of mortalin expression)</li> <li>- Binding to mot-2 and abrogation of its interaction with p53</li> <li>- Enhancement of anti-tumor activity</li> <li>- Overcoming the limited efficacy of photodynamic therapy</li> <li>- Induction of apoptosis or necrosis</li> <li>- Decreased drug resistance of cancer cells</li> </ul>    | [48-52]  |
|                    | Mortaparib                                                                     | <ul style="list-style-type: none"> <li>- Abrogation of cancer cell-specific mortalin–p53 interactions</li> <li>- Induction of growth arrest/apoptosis signaling</li> <li>- Inhibition of cancer cell migration, metastasis, and angiogenesis <i>in vitro</i></li> <li>- Potent anti-tumor and anti-metastatic effects</li> <li>- A first dual inhibitor of mortalin and poly(ADP-ribose) polymerase 1 (PARP-1)</li> </ul>         | [53]     |
|                    | Mortaparib <sup>Plus</sup>                                                     | <ul style="list-style-type: none"> <li>- Prevention of mortalin–p53 interaction</li> <li>- Induction of growth arrest and apoptosis</li> <li>- Induction of cancer cell death via multiple mechanisms</li> </ul>                                                                                                                                                                                                                  | [54]     |
|                    | SHetA2                                                                         | <ul style="list-style-type: none"> <li>- Disruption of mortalin–p53 complexes in ovarian cancer cells</li> <li>- Induction of apoptosis in cancer cells</li> <li>- Tumor growth inhibition in orthotopic ovarian tumor model (combination with PRIMA-1MET)</li> </ul>                                                                                                                                                             | [55-59]  |
| Peptide            | SMR of Nef                                                                     | <ul style="list-style-type: none"> <li>- Disruption of the interaction of Nef with mortalin</li> <li>- Antagonization of the functions of mortalin (SMR-CLU)</li> <li>- Decrease in breast cancer cell metastasis (SMT-CLU)</li> <li>- Inhibition of growth (PEG-SMRwt-CLU)</li> <li>- Cell cycle arrest at G<sub>2</sub>/M phase (PEG-SMRwt-CLU)</li> <li>- Increased sensitivity to cisplatin and paclitaxel (SMRwt)</li> </ul> | [60, 61] |
|                    | Mot-P2 or Mot-P7                                                               | <ul style="list-style-type: none"> <li>- Antibody-mediated and complement-dependent cell killing</li> <li>- Increased plasma membrane perforation and mitochondrial inner membrane depolarization</li> <li>- Decrease in ATP levels</li> <li>- Increased cell death on combination with rituximab</li> </ul>                                                                                                                      | [62]     |
| Antibody           | i-mot Ab                                                                       | <ul style="list-style-type: none"> <li>- Enhanced transgene expression in mortalin-positive cells (i-mot Ab/PEI complex)</li> <li>- Increased cellular uptake of CAPE (CAPE-MotAb)</li> <li>- Stronger growth arrest/apoptosis (CAPE-MotAb)</li> <li>- Downregulation of the expression levels of proteins involved in cell migration (CAPE-MotAb)</li> </ul>                                                                     | [64, 66] |

|              |                             |                                                                                                                                                                                                                                                                                                                                                                                                                                                                                                                                                                                                                                                                                                                                             |                    |
|--------------|-----------------------------|---------------------------------------------------------------------------------------------------------------------------------------------------------------------------------------------------------------------------------------------------------------------------------------------------------------------------------------------------------------------------------------------------------------------------------------------------------------------------------------------------------------------------------------------------------------------------------------------------------------------------------------------------------------------------------------------------------------------------------------------|--------------------|
|              |                             | - Significant suppression of tumor growth (CAPE-MotAb)                                                                                                                                                                                                                                                                                                                                                                                                                                                                                                                                                                                                                                                                                      |                    |
| Nucleic acid | shRNA<br>motalin<br>against | <ul style="list-style-type: none"> <li>- Induction of mutant p53-mediated tumor-specific apoptosis</li> <li>- Increased responsiveness of cancer cells to chemotherapeutic drugs</li> <li>- Reduction in cancer cell stemness</li> <li>- Downregulation of the expression levels of ATP binding cassette subfamily G member 2 (ABCG2), POU class 5 homeobox 1 (POU5F1/OCT-4), CD133, aldehyde dehydrogenase 1 (ALDH1), CD9, ATP binding cassette subfamily C member 1 (ABCC1/MRP1), and connexin</li> <li>- Enhanced cancer cell-killing and anti-tumor effects on cancer cells (mot-Adon)</li> <li>- Enhanced apoptosis (mediated by reactivation of p53) (mot-Adon)</li> <li>- Suppression of microvessel formation (mot-Adon)</li> </ul> | [9, 16, 67, 70-75] |
